# Supplementary material for: A Juvenile Component in the Pre- and Post-Collisional Magmatism in the Transition Zone between the Araçuaí and Ribeira Orogens (SE Brazil)
Source: MDPI journal article supplement (doi:10.3390/min12111378), 2022-10-29
Supplement: s1 [file s1]

Archive with 4 entries (4 files):
- Supplementary material A.pdf
- Supplementary material B.pdf
- Supplementary material C.xlsx
- Supplementary material D.xlsx
