# Supplementary material for: A Juvenile Component in the Pre- and Post-Collisional Magmatism in the Transition Zone between the Araçuaí and Ribeira Orogens (SE Brazil)
Source: MDPI journal article supplement (doi:10.3390/min12111378), 2022-10-29
Supplement: s1 [file s1 › Supplementary material C.xlsx]

## Sheet: U-Pb analysis
SAIC-02
									Isotope ratiosc						Ages (Ma)
Spot number	ƒ 206a	Pb	Th	U	Th/Ub	207Pb/	1 s	206Pb/	1 s	Rhod	207Pb/	1 s	206Pb/	1 s	207Pb/	1 s	207Pb/	1 s	%	%
		ppm	ppm	ppm		235U	[%]	238U	[%]		206Pbe	[%]	238U	abs	235U	abs	206Pb	abs	Concf	Disc.
01_A	0.00319093	17.3372	94.8655	149.932	0.632722	0.783895	2.14632	0.0953559	1.33584	0.622385	0.0596224	1.67995	587.135	7.84319	587.703	12.614	589.897	9.90998	99.5318	0.468214
02_A	0.00392687	6.3945	38.7538	54.0963	0.716384	0.791551	2.29149	0.0961562	0.936203	0.408556	0.0597036	2.09152	591.843	5.54085	592.052	13.5668	592.85	12.3996	99.8302	0.169828
03_A*	0.00573502	11.8299	95.7175	102.852	0.930638	0.732205	1.82149	0.0893266	1.20231	0.660073	0.0594498	1.3683	551.553	6.6314	557.847	10.1611	583.609	7.98555	94.5073	5.49268
04_A	0.00464599	8.49945	52.1142	72.9837	0.714053	0.775162	2.4736	0.0940751	1.09201	0.441465	0.0597608	2.21951	579.593	6.3292	582.72	14.4142	594.925	13.2044	97.4228	2.57719
05_A	0.0047899	8.74753	68.1779	71.3784	0.955161	0.769798	2.0898	0.0931356	0.990817	0.474121	0.059946	1.83998	574.055	5.68783	579.647	12.1135	601.624	11.0698	95.4175	4.58248
06_A*	0.00404955	19.514	109.895	163.216	0.673313	0.841128	8.75274	0.101137	9.25143	0.713983	0.0603183	1.22721	621.07	7.77226	619.768	10.8629	615.014	7.54749	100.985	-0.984811
07_A*	0.000762328	39.4382	198.733	413.424	0.4807	0.666656	1.69292	0.0839405	1.04186	0.26	0.0576008	1.33435	519.601	5.41354	518.677	8.78078	514.611	6.86671	100.97	-0.969618
08_A*	0.00364673	28.0118	168.281	231.965	0.725458	0.779256	2.57688	0.0923208	1.69568	0.658036	0.061218	1.94035	569.248	9.6526	585.059	15.0762	646.903	12.5522	87.9958	12.0042
09_A	0.00126155	58.1957	85.2733	548.476	0.155473	0.815988	1.51754	0.0987847	1.02233	0.673676	0.0599091	1.1215	607.283	6.20843	605.807	9.19337	600.292	6.7323	101.164	-1.16449
01_B*	0.00615606	13.5947	67.3408	117.973	0.570816	0.843565	1.95349	0.100039	1.4434	0.738883	0.0611572	1.31632	614.638	8.87168	621.111	12.1333	644.767	8.48722	95.3272	4.6728
02_B	0.00482953	11.9937	94.9016	96.0977	0.987553	0.799488	2.02536	0.0969236	1.04347	0.515204	0.0598248	1.73587	596.355	6.22279	596.54	12.0821	597.245	10.3674	99.8509	0.149123
03_B	0.00488168	6.25692	47.3308	50.306	0.940859	0.799822	2.02688	0.0968628	1.09956	0.542487	0.0598874	1.70271	595.998	6.55333	596.728	12.095	599.507	10.2079	99.4146	0.585416
04_B	0.00462433	6.52794	50.4811	51.3917	0.982282	0.812771	2.19441	0.0972575	1.14387	0.521267	0.0606099	1.87269	598.317	6.84398	604.007	13.2544	625.419	11.7122	95.6666	4.3334
05_B	0.00494332	7.81731	59.9915	61.9212	0.968837	0.795139	1.79284	0.0958343	1.00645	0.561372	0.0601756	1.48369	589.95	5.93755	594.083	10.6509	609.896	9.04895	96.7296	3.27037
06_B	0.00500274	9.5115	74.9937	77.4198	0.968663	0.75924	2.35332	0.0920469	1.01949	0.433214	0.059823	2.12103	567.631	5.78696	573.571	13.498	597.179	12.6663	95.0521	4.94791
07_B	0.00293241	26.3014	146.933	228.822	0.642126	0.78692	1.78366	0.0956482	1.02814	0.57642	0.0596695	1.45753	588.855	6.05425	589.423	10.5133	591.612	8.62291	99.534	0.466022
08_B	0.0019774	32.7155	161.112	288.98	0.55752	0.801077	1.91746	0.0976749	1.14672	0.598043	0.0594826	1.53677	600.768	6.88914	597.436	11.4556	584.805	8.98713	102.73	-2.72961
09_B*	0.00949772	8.93482	79.8754	68.4651	1.16666	0.810312	2.80223	0.0980448	1.43756	0.513005	0.0599414	2.40539	602.94	8.66763	602.629	16.8871	601.459	14.4675	100.246	-0.246188
a - Fraction of the non-radiogenic 206Pb in the analyzed zircon spot, where ƒ206=[206Pb/204Pb]c/[206Pb/204Pb]s (c=common; s=sample).
b - Th/U ratios and amount of Pb, Th and U (in ppm) are calculated relative to 91500 reference zircons.
c - Corrected for background and within-run Pb/U fractionation and normalized to reference zircon GJ-1 (ID-TIMS values/measured value); 207Pb/235U calculated using (207Pb/206Pb)/(238U/206Pb * 1/137.88).
d - Rho is the correlation error defined as the quotient of the propagated errors of the 206Pb/238U and the 207Pb/235U ratio.
e - Corrected for mass-bias by normalizing to GJ-1 reference zircon and common Pb using the model Pb composition of Stacey and Kramers (1975).
f - Degree of concordance = (206Pb/238U age * 100/207Pb/206U age)
g - Degree of discordance = concordance - 100
* Discarted data by ƒ 206>0.005 and/or Th/U<0.19 and/or Rho<0.3 and/or Disc>5% and/or 1s [%] > 8.0
SAIC - 06A
									Isotope ratiosc						Ages (Ma)
Spot number	ƒ 206a	Pb	Th	U	Th/Ub	207Pb/	1 s	206Pb/	1 s	Rhod	207Pb/	1 s	206Pb/	1 s	207Pb/	1 s	207Pb/	1 s	%	%
		ppm	ppm	ppm		235U	[%]	238U	[%]		206Pbe	[%]	238U	abs	235U	abs	206Pb	abs	Concf	Disc.
01_A**	0.00479239	29.9343	208.087	275.202	0.756125	0.756583	2.37031	0.0932128	1.66899	0.704124	0.058868	1.6831	574.51	9.58854	572.037	13.5591	562.219	9.46273	102.186	-2.18628
02_A	0.00310442	13.5673	115.494	137.091	0.842464	0.642497	1.93407	0.0812459	0.947458	0.489878	0.0573546	1.6861	503.555	4.77097	503.851	9.74483	505.194	8.5181	99.6755	0.324461
03_A*	0.0134418	13.95	110.776	134.144	0.825802	0.739537	2.08522	0.0863128	1.05328	0.505116	0.0621417	1.79965	533.694	5.62129	562.135	11.7218	678.989	12.2195	78.6012	21.3988
04_A*	0.00793515	9.57461	76.9236	85.2534	0.902294	0.727252	1.98307	0.0880075	1.00122	0.504882	0.0599327	1.71176	543.743	5.44405	554.939	11.0048	601.146	10.2902	90.451	9.54899
05_A**	0.00450257	9.33502	88.8047	88.5228	1.00318	0.683845	2.10119	0.0854519	1.01068	0.481005	0.058041	1.84215	528.582	5.3423	529.096	11.1173	531.311	9.78755	99.4864	0.51363
06_A**	0.00487574	47.968	355.546	497.077	0.715273	0.684282	2.48637	0.0847285	1.87728	0.75503	0.0585739	1.63029	524.285	9.84233	529.359	13.1618	551.296	8.98771	95.1006	4.89942
07_A	0.00472092	6.84135	88.5223	58.68	1.50856	0.652007	2.81431	0.0823431	1.43764	0.510833	0.0574281	2.41941	510.093	7.33331	509.713	14.3449	508.009	12.2908	100.41	-0.410204
08_A**	0.00461296	8.75251	62.92	84.7785	0.74217	0.699636	2.63785	0.0871915	1.21225	0.459562	0.0581964	2.34279	538.906	6.53291	538.573	14.2067	537.164	12.5846	100.324	-0.324233
09_A	0.00412407	27.7091	420.18	216.285	1.94272	0.673664	2.10121	0.0837374	1.06103	0.504962	0.0583475	1.81364	518.392	5.50031	522.938	10.988	542.836	9.84512	95.497	4.50302
01_B	0.00429756	14.3264	157.534	121.779	1.29361	0.645927	2.18788	0.0811043	1.45575	0.66537	0.0577615	1.63328	502.711	7.31822	505.969	11.07	520.727	8.50495	96.5403	3.45971
02_B	0.0036555	15.5919	132.282	152.647	0.866587	0.628162	2.36291	0.0796523	1.24622	0.527408	0.0571969	2.00755	494.047	6.15689	494.95	11.6952	499.133	10.0204	98.9811	1.01892
03_B	0.00387505	12.0768	69.2549	122.001	0.567659	0.630138	2.76901	0.0800606	1.66016	0.599547	0.0570841	2.21615	496.485	8.24241	496.182	13.7393	494.784	10.9652	100.344	-0.34365
04_B**	0.00398931	20.0203	108.84	177.837	0.612017	0.758691	2.39966	0.0929257	1.38285	0.576268	0.0592145	1.96115	572.817	7.92117	573.255	13.7561	574.99	11.2764	99.622	0.377989
05_B	0.0041104	9.31071	136.657	75.1808	1.81771	0.629125	2.53543	0.0802604	1.56601	0.617651	0.0568505	1.994	497.677	7.79368	495.551	12.5644	485.74	9.68566	102.457	-2.45735
06_B	0.00378716	18.083	176.837	176.106	1.00415	0.615165	1.9059	0.0787457	0.834155	0.437669	0.0566582	1.71367	488.632	4.07595	486.812	9.27817	478.256	8.19572	102.169	-2.16948
07_B	0.00384347	24.2535	265.602	223.232	1.1898	0.643127	2.13434	0.0805651	1.53485	0.719121	0.057896	1.48312	499.495	7.66648	504.24	10.7622	525.829	7.79868	94.9917	5.00826
08_B*	0.00604831	10.3294	137.882	86.1313	1.60083	0.637452	2.49886	0.0793019	1.05958	0.424025	0.0582992	2.26309	491.954	5.21263	500.727	12.5125	541.025	12.2439	90.93	9.06995
09_B	0.00443338	15.2448	183.916	133.87	1.37384	0.635591	2.15376	0.0807851	1.0862	0.504324	0.0570618	1.85981	500.807	5.43974	499.573	10.7596	493.923	9.186	101.394	-1.39381
a - Fraction of the non-radiogenic 206Pb in the analyzed zircon spot, where ƒ206=[206Pb/204Pb]c/[206Pb/204Pb]s (c=common; s=sample).
b - Th/U ratios and amount of Pb, Th and U (in ppm) are calculated relative to 91500 reference zircons.
c - Corrected for background and within-run Pb/U fractionation and normalized to reference zircon GJ-1 (ID-TIMS values/measured value); 207Pb/235U calculated using (207Pb/206Pb)/(238U/206Pb * 1/137.88).
d - Rho is the correlation error defined as the quotient of the propagated errors of the 206Pb/238U and the 207Pb/235U ratio.
e - Corrected for mass-bias by normalizing to GJ-1 reference zircon and common Pb using the model Pb composition of Stacey and Kramers (1975).
f - Degree of concordance = (206Pb/238U age * 100/207Pb/206U age)
g - Degree of discordance = concordance - 100
* Discarted data by ƒ 206>0.005 and/or Th/U<0.19 and/or Rho<0.3 and/or Disc>5% and/or 1s [%] > 8.0
** Grains interpreted as inheritance
SAIC - 07A
									Isotope ratiosc						Ages (Ma)
Spot number	ƒ 206a	Pb	Th	U	Th/Ub	207Pb/	1 s	206Pb/	1 s	Rhod	207Pb/	1 s	206Pb/	1 s	207Pb/	1 s	207Pb/	1 s	%	%
		ppm	ppm	ppm		235U	[%]	238U	[%]		206Pbe	[%]	238U	abs	235U	abs	206Pb	abs	Concf	Disc.
01_A	0.0047349	11.7849	192.369	87.0093	2.2109	0.660256	2.18986	0.0830539	1.09283	0.499042	0.0576569	1.89768	514.325	5.62071	514.771	11.2727	516.747	9.80622	99.5314	0.468619
02_A	0.00458966	14.394	222.647	112.609	1.97717	0.636952	2.12657	0.0807543	1.14634	0.539056	0.0572058	1.79115	500.624	5.73886	500.417	10.6417	499.474	8.94632	100.23	-0.230176
03_A	0.00461939	4.433	48.4567	40.1012	1.20836	0.652463	2.13124	0.0823973	1.10199	0.517064	0.0574304	1.82423	510.416	5.62474	509.994	10.8692	508.098	9.26889	100.456	-0.456243
04_A**	0.00476587	10.3445	163.407	78.0657	2.09319	0.668866	2.27747	0.0840721	1.45025	0.636784	0.0577013	1.75602	520.383	7.54688	520.023	11.8434	518.44	9.10393	100.375	-0.374813
05_A	0.00504468	12.3345	197.779	93.9257	2.10569	0.642646	2.44476	0.0812392	1.18653	0.485335	0.0573727	2.13752	503.515	5.97434	503.943	12.3202	505.887	10.8134	99.5312	0.468787
06_A	0.00493106	3.89289	60.1688	30.3868	1.9801	0.617892	2.18603	0.078767	1.21044	0.553716	0.0568941	1.82032	488.759	5.91613	488.525	10.6793	487.431	8.87279	100.272	-0.272431
07_A	0.00458785	4.99058	63.6506	43.2693	1.47104	0.634553	2.14889	0.0804095	1.07549	0.500489	0.0572346	1.86038	498.567	5.36205	498.928	10.7214	500.585	9.31281	99.5968	0.40325
08_A	0.00479866	10.5384	141.604	88.5311	1.59948	0.624076	2.03063	0.0793462	1.00385	0.494356	0.057044	1.76514	492.219	4.94116	492.399	9.99878	493.236	8.7063	99.7939	0.206088
09_A	0.00319885	18.3185	273.819	143.2	1.91214	0.646785	2.44097	0.0817886	1.24047	0.508186	0.0573543	2.10228	506.79	6.28656	506.498	12.3635	505.182	10.6204	100.318	-0.318169
01_B	0.00392411	19.1115	327.235	134.651	2.43025	0.645229	2.4487	0.0815124	1.15603	0.472098	0.0574102	2.15864	505.144	5.83959	505.539	12.3791	507.326	10.9514	99.5698	0.430239
02_B	0.0049553	8.85249	122.165	73.0947	1.67132	0.626051	2.01475	0.0795709	1.02608	0.509283	0.057063	1.73389	493.561	5.06431	493.633	9.94545	493.969	8.56486	99.9174	0.0825584
03_B	0.00447213	4.26816	46.3109	38.6472	1.1983	0.631972	2.30895	0.0802419	0.969618	0.419939	0.0571209	2.09549	497.567	4.82449	497.323	11.483	496.205	10.3979	100.274	-0.27446
04_B	0.00403995	16.6995	263.957	124.638	2.11779	0.634946	1.98919	0.0805791	1.0929	0.54942	0.0571495	1.66206	499.579	5.45989	499.172	9.92946	497.308	8.26555	100.457	-0.456558
05_B	0.00470256	13.9669	218.613	107.573	2.03223	0.644214	1.83504	0.0815052	1.02903	0.560767	0.057325	1.51937	505.101	5.19765	504.912	9.26536	504.057	7.65848	100.207	-0.206976
06_B	0.00491167	5.90031	82.3206	47.7394	1.72438	0.620262	2.58596	0.0789202	1.26328	0.488515	0.0570015	2.25639	489.674	6.18597	490.012	12.6715	491.589	11.0922	99.6105	0.389532
07_B	0.00490783	8.90005	119.323	72.1714	1.65332	0.632557	1.97081	0.0799977	1.16675	0.592016	0.0573483	1.58833	496.109	5.78837	497.687	9.80848	504.951	8.0203	98.2489	1.7511
08_B**	0.00466669	6.73805	108.919	48.8764	2.22847	0.706387	2.6243	0.0879013	1.48381	0.565411	0.0582835	2.16455	543.113	8.05876	542.598	14.2394	540.436	11.698	100.495	-0.4953
09_B	0.00295546	5.82088	72.7847	49.6986	1.46452	0.648684	2.30923	0.0816203	1.1401	0.493716	0.0576412	2.00816	505.787	5.7665	507.668	11.7232	516.151	10.3651	97.992	2.00795
a - Fraction of the non-radiogenic 206Pb in the analyzed zircon spot, where ƒ206=[206Pb/204Pb]c/[206Pb/204Pb]s (c=common; s=sample).
b - Th/U ratios and amount of Pb, Th and U (in ppm) are calculated relative to 91500 reference zircons.
c - Corrected for background and within-run Pb/U fractionation and normalized to reference zircon GJ-1 (ID-TIMS values/measured value); 207Pb/235U calculated using (207Pb/206Pb)/(238U/206Pb * 1/137.88).
d - Rho is the correlation error defined as the quotient of the propagated errors of the 206Pb/238U and the 207Pb/235U ratio.
e - Corrected for mass-bias by normalizing to GJ-1 reference zircon and common Pb using the model Pb composition of Stacey and Kramers (1975).
f - Degree of concordance = (206Pb/238U age * 100/207Pb/206U age)
g - Degree of discordance = concordance - 100
** Grains interpreted as inheritance
SAIC - 09
									Isotope ratiosc						Ages (Ma)
Spot number	ƒ 206a	Pb	Th	U	Th/Ub	207Pb/	1 s	206Pb/	1 s	Rhod	207Pb/	1 s	206Pb/	1 s	207Pb/	1 s	207Pb/	1 s	%	%
		ppm	ppm	ppm		235U	[%]	238U	[%]		206Pbe	[%]	238U	abs	235U	abs	206Pb	abs	Concf	Disc.
01_A	0.00473433	16.579	286.747	120.806	2.37362	0.657398	1.9453	0.0825396	1.42165	0.73081	0.057765	1.32783	511.264	7.26836	513.021	9.97981	520.86	6.91611	98.1577	1.84234
02_A**	0.00388254	11.9817	189.307	85.2687	2.22012	0.677035	1.80074	0.0853474	0.833257	0.46273	0.0575334	1.59636	527.962	4.39928	524.981	9.45355	512.037	8.17394	103.11	-3.11
03_A	0.00503368	15.9952	241.217	120.48	2.00213	0.655261	2.19751	0.0824899	1.02665	0.467189	0.057612	1.94294	510.967	5.24584	511.711	11.2449	515.036	10.0068	99.21	0.789964
04_A	0.00395838	26.6318	364.113	195.84	1.85924	0.633506	2.98856	0.080382	2.42106	0.81011	0.0571598	1.75213	498.403	12.0666	498.277	14.8913	497.702	8.72037	100.141	-0.140688
05_A*	0.00697894	14.4957	228.423	102.643	2.22541	0.678666	2.23897	0.0850882	0.886728	0.396042	0.0578476	2.0559	526.422	4.66793	525.968	11.7763	523.996	10.7728	100.463	-0.463093
06_A**	0.00475885	8.52691	126.918	58.7906	2.15882	0.720591	2.26789	0.0901415	1.32868	0.585866	0.0579779	1.83791	556.374	7.39242	551.016	12.4964	528.927	9.72123	105.189	-5.18912
07_A**	0.00434403	16.0134	221.412	112.226	1.97292	0.691492	2.42291	0.0868671	1.27026	0.524268	0.0577339	2.06324	536.982	6.82104	533.697	12.931	519.679	10.7222	103.33	-3.32962
08_A	0.00500327	7.24293	112.975	56.6192	1.99534	0.661028	3.07076	0.0827259	1.12979	0.367918	0.0579531	2.85537	512.373	5.78872	515.242	15.8219	527.991	15.0761	97.042	2.95798
09_A*	0.00564203	14.1606	213.277	90.6665	2.35232	0.808151	2.3188	0.098606	0.893262	0.385226	0.0594413	2.13984	606.234	5.41526	601.416	13.9456	583.297	12.4816	103.932	-3.93233
01_B**	0.0041913	12.4664	193.43	87.0121	2.22302	0.685872	2.37835	0.086274	0.831241	0.349504	0.0576583	2.22835	533.463	4.43437	530.317	12.6128	516.802	11.5162	103.224	-3.22396
02_B**	0.0034585	3.5448	32.9881	31.08	1.06139	0.706005	3.33647	0.0880464	1.72551	0.517166	0.058156	2.85563	543.973	9.38629	542.371	18.096	535.645	15.2961	101.555	-1.55479
03_B	0.00473533	8.73777	135.754	64.295	2.11143	0.642353	3.17305	0.0816043	1.35629	0.42744	0.05709	2.86858	505.691	6.85864	503.762	15.9846	495.01	14.1998	102.158	-2.15774
04_B**	0.00438174	12.9052	194.018	88.9939	2.18013	0.7142	3.32073	0.0889312	1.93452	0.582561	0.0582458	2.69904	549.213	10.6247	547.237	18.1722	539.018	14.5483	101.891	-1.89132
05_B*	0.0108531	6.59869	91.9621	48.8716	1.88171	0.742656	3.53497	0.0912699	1.31518	0.372048	0.0590145	3.28121	563.043	7.40504	563.954	19.9356	567.63	18.6251	99.192	0.808049
06_B*	0.00455409	14.8684	232.349	102.065	2.27648	0.702823	2.94083	0.0874218	0.852296	0.289814	0.0583075	2.81462	540.271	4.60471	540.475	15.8945	541.337	15.2366	99.8031	0.196905
07_B**	0.00456796	8.91352	132.762	59.7571	2.2217	0.698513	2.73897	0.086987	1.19555	0.436496	0.0582397	2.46427	537.693	6.42838	537.903	14.733	538.792	13.2773	99.796	0.203976
08_B*	0.0092576	7.66765	100.979	50.7566	1.98947	0.755931	4.46562	0.0922317	3.53895	0.792487	0.059443	2.72353	568.722	20.1268	571.66	25.5282	583.36	15.888	97.4907	2.50931
09_B*	0.00859025	7.91084	120.461	56.0516	2.14911	0.655295	3.47142	0.0821177	1.71352	0.493607	0.057876	3.01905	508.751	8.71753	511.732	17.7644	525.072	15.8522	96.8916	3.10843
a - Fraction of the non-radiogenic 206Pb in the analyzed zircon spot, where ƒ206=[206Pb/204Pb]c/[206Pb/204Pb]s (c=common; s=sample).
b - Th/U ratios and amount of Pb, Th and U (in ppm) are calculated relative to 91500 reference zircons.
c - Corrected for background and within-run Pb/U fractionation and normalized to reference zircon GJ-1 (ID-TIMS values/measured value); 207Pb/235U calculated using (207Pb/206Pb)/(238U/206Pb * 1/137.88).
d - Rho is the correlation error defined as the quotient of the propagated errors of the 206Pb/238U and the 207Pb/235U ratio.
e - Corrected for mass-bias by normalizing to GJ-1 reference zircon and common Pb using the model Pb composition of Stacey and Kramers (1975).
f - Degree of concordance = (206Pb/238U age * 100/207Pb/206U age)
g - Degree of discordance = concordance - 100
* Discarted data by ƒ 206>0.005 and/or Th/U<0.19 and/or Rho<0.3 and/or Disc>5% and/or 1s [%] > 8.0
** Grains interpreted as inheritance
SAIC - 10A
									Isotope ratiosc						Ages (Ma)
Spot number	ƒ 206a	Pb	Th	U	Th/Ub	207Pb/	1 s	206Pb/	1 s	Rhod	207Pb/	1 s	206Pb/	1 s	207Pb/	1 s	207Pb/	1 s	%	%
		ppm	ppm	ppm		235U	[%]	238U	[%]		206Pbe	[%]	238U	abs	235U	abs	206Pb	abs	Concf	Disc.
01_A	0.00447112	9.12263	71.013	89.6474	0.792137	0.654642	1.58858	0.0825977	0.963525	0.606532	0.0574823	1.26302	511.61	4.92949	511.331	8.12291	510.086	6.44247	100.299	-0.298815
02_A	0.00343605	17.7281	144.138	168.678	0.854514	0.665632	1.79972	0.0832015	0.917917	0.510032	0.0580232	1.54804	515.204	4.72915	518.053	9.32353	530.639	8.21451	97.0912	2.90875
03_A**	0.0038832	14.7428	157.473	121.48	1.29629	0.680524	1.87264	0.0848089	1.30887	0.698943	0.058197	1.33927	524.763	6.86846	527.091	9.87052	537.186	7.19438	97.6873	2.31267
04_A	0.00441068	14.7521	182.753	126.446	1.4453	0.657838	2.22211	0.0829156	1.32437	0.595999	0.0575416	1.78432	513.502	6.80069	513.291	11.4059	512.35	9.14196	100.225	-0.225
05_A*	0.00555003	14.0994	83.9426	143.598	0.584569	0.677085	1.83655	0.0833405	1.19089	0.648439	0.0589232	1.3981	516.031	6.14537	525.011	9.6421	564.258	7.88892	91.453	8.54698
06_A	0.00453523	14.2882	176.333	120.697	1.46096	0.642398	1.79208	0.0812932	0.921798	0.514372	0.0573124	1.53683	503.837	4.64436	503.79	9.02833	503.575	7.73909	100.052	-0.0520082
07_A	0.00422669	6.73297	97.1863	51.6018	1.88339	0.671819	2.12756	0.084902	1.02097	0.479877	0.0573895	1.86659	525.316	5.36331	521.818	11.102	506.534	9.45489	103.708	-3.70804
08_A	0.00450358	11.4312	131.014	101.008	1.29706	0.657588	1.7684	0.0821806	1.09022	0.616499	0.0580341	1.39236	509.126	5.55058	513.138	9.07433	531.049	7.39412	95.8717	4.12829
09_A**	0.00354583	21.9145	166.315	212.827	0.781457	0.688124	1.96901	0.085907	1.10626	0.561837	0.0580948	1.62886	531.285	5.8774	531.673	10.4687	533.338	8.68731	99.6151	0.384915
01_B**	0.00317356	24.5357	224.606	226.874	0.990002	0.681507	1.70786	0.0848347	1.31026	0.767197	0.0582634	1.09544	524.916	6.87778	527.685	9.0121	539.679	5.91186	97.2645	2.73553
02_B	0.00289519	16.1997	134.513	158.193	0.850309	0.66766	2.24558	0.0839149	1.40849	0.627228	0.0577053	1.74894	519.448	7.31637	519.289	11.661	518.589	9.0698	100.166	-0.165603
03_B	0.00385911	9.37945	96.9119	77.9828	1.24273	0.672621	1.91614	0.0848783	1.53994	0.80367	0.0574741	1.14025	525.175	8.0874	522.304	10.0081	509.772	5.81265	103.022	-3.02162
04_B**	0.00468396	8.18987	126.329	59.8112	2.11212	0.680884	2.777	0.0851751	1.93568	0.69704	0.0579775	1.9912	526.939	10.1998	527.309	14.6434	528.912	10.5317	99.627	0.373013
05_B*	0.00655831	3.50755	56.9529	25.4691	2.23616	0.655475	2.51123	0.0825738	1.10971	0.441899	0.0575722	2.25274	511.467	5.67581	511.842	12.8536	513.519	11.5683	99.6004	0.399604
06_B*	0.00880969	6.24104	52.5511	53.0257	0.99105	0.740216	5.22133	0.0895882	1.32652	0.254057	0.0599248	5.05002	553.101	7.33697	562.532	29.3717	600.861	30.3436	92.0513	7.94867
07_B*	0.00359069	35.602	320.814	317.051	1.01187	0.708942	2.90654	0.0856565	1.79525	0.617658	0.0600273	2.28584	529.798	9.51117	544.118	15.815	604.559	13.8192	87.6338	12.3662
08_B**	0.00444887	9.30094	129.452	69.1339	1.87248	0.678374	2.70039	0.0849129	2.00563	0.74272	0.0579421	1.80818	525.381	10.5372	525.791	14.1984	527.573	9.53949	99.5845	0.415479
09_B	0.00445763	5.14654	37.9784	50.6569	0.749719	0.662215	1.66156	0.0835872	1.20132	0.723005	0.057459	1.14788	517.499	6.2168	515.968	8.57313	509.194	5.84492	101.631	-1.631
a - Fraction of the non-radiogenic 206Pb in the analyzed zircon spot, where ƒ206=[206Pb/204Pb]c/[206Pb/204Pb]s (c=common; s=sample).
b - Th/U ratios and amount of Pb, Th and U (in ppm) are calculated relative to 91500 reference zircons.
c - Corrected for background and within-run Pb/U fractionation and normalized to reference zircon GJ-1 (ID-TIMS values/measured value); 207Pb/235U calculated using (207Pb/206Pb)/(238U/206Pb * 1/137.88).
d - Rho is the correlation error defined as the quotient of the propagated errors of the 206Pb/238U and the 207Pb/235U ratio.
e - Corrected for mass-bias by normalizing to GJ-1 reference zircon and common Pb using the model Pb composition of Stacey and Kramers (1975).
f - Degree of concordance = (206Pb/238U age * 100/207Pb/206U age)
g - Degree of discordance = concordance - 100
* Discarted data by ƒ 206>0.005 and/or Th/U<0.19 and/or Rho<0.3 and/or Disc>5% and/or 1s [%] > 8.0
** Grains interpreted as inheritance
SAIC - 10B
									Isotope ratiosc						Ages (Ma)
Spot number	ƒ 206a	Pb	Th	U	Th/Ub	207Pb/	1 s	206Pb/	1 s	Rhod	207Pb/	1 s	206Pb/	1 s	207Pb/	1 s	207Pb/	1 s	%	%
		ppm	ppm	ppm		235U	[%]	238U	[%]		206Pbe	[%]	238U	abs	235U	abs	206Pb	abs	Concf	Disc.
01_A	0.00493422	10.5653	116.147	94.048	1.23497	0.658612	2.3983	0.0828827	0.908621	0.37886	0.0576322	2.21952	513.306	4.66401	513.765	12.3216	515.806	11.4484	99.5153	0.484668
02_A	0.00449456	4.23837	42.9191	38.9826	1.10098	0.649939	3.66924	0.0821326	1.18217	0.322185	0.0573926	3.47358	508.839	6.01536	508.441	18.6559	506.649	17.5989	100.432	-0.432284
03_A**	0.0029386	25.0237	407.109	184.355	2.20828	0.671619	2.11411	0.0842332	0.972007	0.45977	0.057828	1.87741	521.341	5.06747	521.696	11.0292	523.25	9.82357	99.6352	0.364835
04_A	0.00257992	22.3799	357.466	161.607	2.21195	0.669228	2.06375	0.0835039	1.27529	0.61795	0.0581254	1.62256	517.003	6.59331	520.243	10.7365	534.493	8.67244	96.7279	3.2721
05_A*	0.00369492	13.2172	118.076	99.3619	1.18834	0.832784	3.83277	0.10005	1.07706	0.281013	0.0603692	3.67833	614.7	6.62068	615.156	23.5775	616.832	22.6891	99.6543	0.345657
06_A	0.0011645	27.0288	149.474	281.874	0.530288	0.654806	1.47597	0.0831935	0.774615	0.524816	0.057085	1.25637	515.156	3.99048	511.432	7.54861	494.82	6.21678	104.11	-4.1099
07_A	0.0035597	19.7674	299.521	157.92	1.89666	0.638976	2.35547	0.0808912	0.981515	0.416695	0.0572904	2.14123	501.44	4.92171	501.672	11.8168	502.731	10.7646	99.7433	0.25673
08_A	0.00478488	9.34608	124.052	76.0606	1.63096	0.656382	2.54197	0.0827159	1.22465	0.481772	0.0575529	2.22752	512.313	6.27404	512.399	13.025	512.781	11.4223	99.9087	0.0912538
09_A**	0.0027348	22.4772	344.25	158.518	2.17168	0.687858	2.76883	0.086012	2.09837	0.757854	0.0580015	1.80645	531.908	11.1614	531.513	14.7167	529.817	9.57089	100.395	-0.394723
01_B	0.00276851	30.5587	481.079	236.47	2.03442	0.645362	1.62308	0.0811568	1.10971	0.683704	0.0576736	1.18446	503.024	5.5821	505.621	8.20665	517.386	6.12823	97.2242	2.77583
02_B	0.00436433	16.1525	217.027	130.088	1.66831	0.638626	2.37692	0.0809071	1.26164	0.530785	0.0572478	2.01446	501.535	6.32754	501.455	11.9192	501.091	10.0943	100.089	-0.0887048
03_B	0.00144815	63.7645	1050.72	433.088	2.42611	0.645776	1.7754	0.0816137	0.859531	0.484135	0.0573875	1.55346	505.748	4.34706	505.876	8.9813	506.457	7.86761	99.8598	0.140176
04_B	0.00299333	21.6401	326.888	164.559	1.98645	0.606203	1.6837	0.0771108	0.96569	0.573552	0.0570167	1.37923	478.854	4.62425	481.163	8.10134	492.179	6.7883	97.2927	2.7073
05_B	0.00214708	37.7198	569.343	273.756	2.07975	0.652919	2.14687	0.0824149	1.18509	0.55201	0.0574583	1.79014	510.521	6.05015	510.274	10.9549	509.165	9.11476	100.266	-0.266235
06_B	0.00183697	51.4277	804.215	370.944	2.16802	0.643395	1.80482	0.0816827	1.28796	0.713624	0.0571276	1.26433	506.159	6.51913	504.406	9.10361	496.464	6.27693	101.953	-1.95282
07_B	0.00458869	12.1869	151.065	101.539	1.48775	0.654404	2.50335	0.0825534	1.33656	0.533907	0.0574923	2.11669	511.346	6.83442	511.185	12.7968	510.469	10.805	100.172	-0.171808
08_B	0.00301835	16.0789	122.273	156.553	0.781032	0.649459	1.6859	0.0827607	0.817797	0.485079	0.056915	1.47427	512.58	4.19186	508.146	8.56685	488.24	7.198	104.985	-4.98518
09_B*	0.00682686	8.11566	81.6095	76.0654	1.07289	0.634274	1.99512	0.0826111	1.26948	0.636292	0.0556849	1.53913	511.689	6.4958	498.755	9.95077	439.826	6.76951	116.339	-16.3391
a - Fraction of the non-radiogenic 206Pb in the analyzed zircon spot, where ƒ206=[206Pb/204Pb]c/[206Pb/204Pb]s (c=common; s=sample).
b - Th/U ratios and amount of Pb, Th and U (in ppm) are calculated relative to 91500 reference zircons.
c - Corrected for background and within-run Pb/U fractionation and normalized to reference zircon GJ-1 (ID-TIMS values/measured value); 207Pb/235U calculated using (207Pb/206Pb)/(238U/206Pb * 1/137.88).
d - Rho is the correlation error defined as the quotient of the propagated errors of the 206Pb/238U and the 207Pb/235U ratio.
e - Corrected for mass-bias by normalizing to GJ-1 reference zircon and common Pb using the model Pb composition of Stacey and Kramers (1975).
f - Degree of concordance = (206Pb/238U age * 100/207Pb/206U age)
g - Degree of discordance = concordance - 100
* Discarted data by ƒ 206>0.005 and/or Th/U<0.19 and/or Rho<0.3 and/or Disc>5% and/or 1s [%] > 8.0
** Grains interpreted as inheritance
SAIC - 12
									Isotope ratiosc						Ages (Ma)
Spot number	ƒ 206a	Pb	Th	U	Th/Ub	207Pb/	1 s	206Pb/	1 s	Rhod	207Pb/	1 s	206Pb/	1 s	207Pb/	1 s	207Pb/	1 s	%	%
		ppm	ppm	ppm		235U	[%]	238U	[%]		206Pbe	[%]	238U	abs	235U	abs	206Pb	abs	Concf	Disc.
01_A	0.00470135	10.926	115.553	96.0607	1.20292	0.649877	3.84361	0.0821251	3.61212	0.939774	0.0573924	1.31373	508.795	18.3783	508.403	19.541	506.642	6.65592	100.425	-0.424929
02_A*	0.00527828	21.8926	297.417	176.651	1.68364	0.660652	3.92156	0.0832404	3.57183	0.910819	0.0575622	1.61884	515.435	18.4105	515.012	20.1965	513.136	8.30688	100.448	-0.448057
03_A	0.00445005	4.52534	39.8995	45.4602	0.87768	0.608215	4.36702	0.0777359	3.84336	0.880089	0.0567459	2.07349	482.594	18.5478	482.433	21.0679	481.67	9.9874	100.192	-0.191876
04_A**	0.00430966	5.94685	57.3952	54.0625	1.06165	0.667245	3.70509	0.0840221	3.51213	0.94792	0.0575957	1.1801	520.086	18.2661	519.036	19.2308	514.417	6.07064	101.102	-1.10203
05_A	0.00443808	8.17252	90.081	72.2707	1.24644	0.621123	3.94557	0.0798202	3.76843	0.955105	0.0564369	1.16894	495.05	18.6556	490.551	19.355	469.599	5.48933	105.42	-5.41966
06_A*	0.0105398	6.88147	69.4752	63.8848	1.08751	0.673632	4.80322	0.0820049	3.64062	0.757953	0.0595774	3.13318	508.079	18.4972	522.918	25.1169	588.26	18.4313	86.3698	13.6302
07_A	0.0046488	10.3878	103.598	97.5376	1.06214	0.632392	4.20652	0.0804624	3.6747	0.873572	0.0570023	2.0473	498.882	18.3324	497.585	20.931	491.621	10.0649	101.477	-1.47698
08_A*	0.00618123	7.01133	71.5354	64.2063	1.11415	0.653238	4.4723	0.0823552	3.74268	0.836857	0.0575279	2.44823	510.166	19.0939	510.469	22.8297	511.829	12.5308	99.675	0.325045
09_A	0.00170907	25.3497	354.873	204.71	1.73354	0.619581	4.199	0.0794613	3.89436	0.927449	0.0565511	1.57022	492.907	19.1956	489.585	20.5577	474.07	7.44393	103.973	-3.97347
01_B	0.00471854	7.68691	83.248	71.6991	1.16107	0.605458	1.72396	0.0773579	1.13262	0.656987	0.0567647	1.29969	480.333	5.44034	480.691	8.28692	482.403	6.26976	99.5709	0.429119
02_B*	0.00485209	6.01366	59.2062	53.4631	1.10742	0.673586	2.66678	0.084505	1.00282	0.276041	0.0578109	2.47105	522.957	5.24432	522.891	13.9444	522.601	12.9137	100.068	-0.0680998
03_B	0.00401984	5.49037	52.1076	50.4587	1.03268	0.664174	2.49412	0.0835496	2.01348	0.807291	0.0576549	1.47191	517.275	10.4152	517.164	12.8987	516.673	7.60498	100.117	-0.116606
04_B	0.00405727	8.13597	80.8598	75.0912	1.07682	0.658387	1.59691	0.0830594	1.02388	0.641165	0.0574899	1.22547	514.358	5.26641	513.627	8.20214	510.375	6.25449	100.78	-0.780483
05_B	0.0040422	5.08725	47.6502	47.3316	1.00673	0.62862	2.11983	0.0798975	1.11627	0.526585	0.0570629	1.80211	495.511	5.53123	495.236	10.4981	493.965	8.9018	100.313	-0.312979
06_B**	0.00417023	15.777	217.834	121.927	1.78659	0.680103	2.53075	0.0852121	1.48085	0.585141	0.0578858	2.05227	527.158	7.80641	526.837	13.3329	525.443	10.7835	100.327	-0.326552
07_B*	0.00575927	4.23717	35.5062	40.3344	0.880297	0.66226	2.59179	0.0833151	1.30015	0.501639	0.0576505	2.2421	515.88	6.70719	515.995	13.3735	516.507	11.5806	99.8787	0.121346
08_B	0.00465736	5.54891	53.0402	54.1263	0.979934	0.628611	1.56767	0.0799042	0.729732	0.465487	0.0570573	1.38748	495.551	3.6162	495.23	7.76359	493.747	6.85062	100.365	-0.365433
09_B*	0.0247847	7.96287	93.4542	65.2723	1.43176	1.00229	2.44234	0.0808871	1.09914	0.450036	0.0898698	2.18104	501.415	5.51127	704.973	17.2179	1422.77	31.0311	35.2423	64.7577
a - Fraction of the non-radiogenic 206Pb in the analyzed zircon spot, where ƒ206=[206Pb/204Pb]c/[206Pb/204Pb]s (c=common; s=sample).
b - Th/U ratios and amount of Pb, Th and U (in ppm) are calculated relative to 91500 reference zircons.
c - Corrected for background and within-run Pb/U fractionation and normalized to reference zircon GJ-1 (ID-TIMS values/measured value); 207Pb/235U calculated using (207Pb/206Pb)/(238U/206Pb * 1/137.88).
d - Rho is the correlation error defined as the quotient of the propagated errors of the 206Pb/238U and the 207Pb/235U ratio.
e - Corrected for mass-bias by normalizing to GJ-1 reference zircon and common Pb using the model Pb composition of Stacey and Kramers (1975).
f - Degree of concordance = (206Pb/238U age * 100/207Pb/206U age)
g - Degree of discordance = concordance - 100
* Discarted data by ƒ 206>0.005 and/or Th/U<0.19 and/or Rho<0.3 and/or Disc>5% and/or 1s [%] > 8.0
** Grains interpreted as inheritance
SAIC - 13
									Isotope ratiosc						Ages (Ma)
Spot number	ƒ 206a	Pb	Th	U	Th/Ub	207Pb/	1 s	206Pb/	1 s	Rhod	207Pb/	1 s	206Pb/	1 s	207Pb/	1 s	207Pb/	1 s	%	%
		ppm	ppm	ppm		235U	[%]	238U	[%]		206Pbe	[%]	238U	abs	235U	abs	206Pb	abs	Concf	Disc.
01_A	0.00486296	12.8196	95.025	100.591	0.944666	0.840254	2.51977	0.101173	1.54326	0.612462	0.0602343	1.99188	621.281	9.58799	619.286	15.6046	612.001	12.1903	101.516	-1.51633
02_A**	0.00357294	66.6732	237.036	534.425	0.443535	1.0382	2.22388	0.120087	1.61756	0.72736	0.0627024	1.52615	731.063	11.8254	723.02	16.0791	698.153	10.6549	104.714	-4.7139
03_A*	0.00421162	5.49287	35.8551	43.5469	0.823368	0.854713	4.16151	0.101207	1.03759	0.24933	0.0612501	4.03008	621.481	6.44843	627.233	26.1023	648.027	26.116	95.9035	4.09646
04_A	0.00376821	4.67948	33.037	36.2136	0.91228	0.880766	3.00821	0.104598	1.26001	0.418856	0.0610712	2.73162	641.299	8.08041	641.397	19.2946	641.741	17.5299	99.9311	0.0689496
05_A	0.00457949	6.71385	56.8562	51.5408	1.10313	0.816364	2.96139	0.0983042	1.67804	0.566639	0.0602296	2.44008	604.463	10.1431	606.018	17.9465	611.834	14.9293	98.7953	1.20474
06_A*	0.0102481	17.6367	94.9455	133.962	0.708748	1.02642	2.87119	0.111051	1.7679	0.615737	0.0670348	2.26236	678.847	12.0013	717.133	20.5903	838.856	18.9779	80.9253	19.0747
07_A*	0.0033905	63.8963	249.198	542.034	0.459746	0.958821	1.98397	0.11476	1.59228	0.802569	0.0605961	1.18356	700.335	11.1513	682.685	13.5443	624.926	7.39635	112.067	-12.0668
08_A*	0.0100703	6.2873	51.8583	47.87	1.08332	0.85363	2.57197	0.0967357	0.969382	0.376903	0.0640002	2.38229	595.25	5.77025	626.639	16.117	741.638	17.668	80.2615	19.7385
09_A	0.00431884	7.07611	55.4867	56.5027	0.982019	0.799883	2.38818	0.0970411	1.27789	0.53509	0.0597818	2.01752	597.045	7.62957	596.762	14.2517	595.687	12.0181	100.228	-0.228073
01_B	0.00346757	6.46125	47.9721	52.4469	0.914679	0.803506	2.81954	0.0964548	1.22554	0.434659	0.0604177	2.53926	593.599	7.27478	598.804	16.8835	618.566	15.707	95.9638	4.0362
02_B	0.00211724	18.98	133.621	154.848	0.862916	0.80669	2.24537	0.0972525	0.952301	0.424118	0.0601596	2.03342	598.287	5.69749	600.595	13.4856	609.318	12.39	98.1897	1.81034
03_B*	0.0151319	7.33305	50.2106	55.1522	0.9104	0.949358	4.28781	0.105382	2.16796	0.505609	0.0653374	3.69936	645.873	14.0022	677.768	29.0614	785.221	29.0481	82.2536	17.7464
04_B*	0.0109844	7.05084	45.6939	58.249	0.784458	0.840483	2.41606	0.0971442	0.832984	0.344769	0.0627495	2.26793	597.651	4.97834	619.412	14.9654	699.753	15.8699	85.4089	14.5911
05_B	0.00422158	10.8344	95.0211	81.2787	1.16908	0.778598	2.64578	0.0949708	1.15964	0.438297	0.0594596	2.3781	584.868	6.78235	584.683	15.4694	583.965	13.8873	100.155	-0.154633
06_B	0.00324805	16.6552	90.9355	138.283	0.657603	0.84809	1.87114	0.102629	0.971282	0.519086	0.0599335	1.5993	629.799	6.11712	623.6	11.6684	601.173	9.61457	104.762	-4.76171
07_B	0.00397159	9.1042	87.8482	66.2643	1.32572	0.8436	3.48381	0.101194	1.37138	0.393645	0.0604615	3.20253	621.405	8.52184	621.13	21.639	620.13	19.8599	100.206	-0.205629
08_B	0.00415037	15.3271	105.735	122.503	0.863122	0.822775	4.11245	0.099702	3.55084	0.863437	0.0598516	2.07455	612.662	21.7547	609.596	25.0693	598.215	12.4103	102.415	-2.41502
09_B*	0.00862763	32.9873	83.6961	363.873	0.230015	0.680151	1.87478	0.0854059	1.05082	0.560505	0.0577585	1.5526	528.31	5.55159	526.865	9.87755	520.613	8.08303	101.478	-1.47836
a - Fraction of the non-radiogenic 206Pb in the analyzed zircon spot, where ƒ206=[206Pb/204Pb]c/[206Pb/204Pb]s (c=common; s=sample).
b - Th/U ratios and amount of Pb, Th and U (in ppm) are calculated relative to 91500 reference zircons.
c - Corrected for background and within-run Pb/U fractionation and normalized to reference zircon GJ-1 (ID-TIMS values/measured value); 207Pb/235U calculated using (207Pb/206Pb)/(238U/206Pb * 1/137.88).
d - Rho is the correlation error defined as the quotient of the propagated errors of the 206Pb/238U and the 207Pb/235U ratio.
e - Corrected for mass-bias by normalizing to GJ-1 reference zircon and common Pb using the model Pb composition of Stacey and Kramers (1975).
f - Degree of concordance = (206Pb/238U age * 100/207Pb/206U age)
g - Degree of discordance = concordance - 100
* Discarted data by ƒ 206>0.005 and/or Th/U<0.19 and/or Rho<0.3 and/or Disc>5% and/or 1s [%] > 8.0
** Grains interpreted as inheritance
