# Supplementary material for: A Juvenile Component in the Pre- and Post-Collisional Magmatism in the Transition Zone between the Araçuaí and Ribeira Orogens (SE Brazil)
Source: MDPI journal article supplement (doi:10.3390/min12111378), 2022-10-29
Supplement: s1 [file s1 › Supplementary material D.xlsx]

## Sheet: Planilha1
Sample SAIC 02
	U/Pb		Sample (Present day ratios)				CHUR	DM	Sample Initial Ratios				DM Model	%	Crustal
	Age (Ma)	±2s	176Hf/177Hf	±2SE	176Lu/177Hf	±2SE	176Hf/177Hf (t)	176Hf/177Hf (t)	176Hf/177Hf (t)	eHf(0)	eHf(t)	±2SE	Age (Ga)	corr	residence
02_A	592	6	0.28207	0.000252524	0.00105406	2.84313e-05	0.282415	0.282822	0.282058	-25.2818	-12.6129	0.519988	2.12069	12.1565	1533.55
03_A	552	7	0.282154	0.000215323	0.00107066	5.93097e-05	0.282412	0.282819	0.282142	-22.3119	-9.54332	0.625283	1.95263	12.2459	1360.79
04_A	580	6	0.282205	0.000303353	0.00141654	3.65818e-05	0.282419	0.282828	0.282189	-20.5153	-8.14374	0.307994	1.86425	16.4979	1284.66
05_A	574	6	0.282158	0.000178456	0.00121888	1.39557e-05	0.282423	0.282832	0.282145	-22.1826	-9.8567	0.216751	1.9559	13.3667	1381.85
06_A	621	8	0.282026	0.00036396	0.000770723	3.35303e-05	0.282402	0.282808	0.282018	-26.8243	-13.6053	0.748546	2.19233	8.55824	1585.05
02_B	596	6	0.282181	0.00029873	0.00106573	3.21156e-05	0.282409	0.282816	0.282169	-21.3743	-8.50446	0.354025	1.89798	12.3746	1301.62
04_B	598	7	0.282337	0.000342543	0.00138039	9.57807e-05	0.282409	0.282816	0.282321	-15.8503	-3.10558	0.253401	1.59377	15.9255	997.774
06_B	568	3	0.282431	0.000320118	0.00130662	3.71168e-05	0.282408	0.282814	0.282416	-12.5238	0.304611	0.0124826	1.40277	15.9598	804.454
07_B	589	6	0.281918	0.000234414	0.00121363	3.32414e-05	0.282413	0.28282	0.281904	-30.6691	-18.0087	0.689481	2.4237	14.2331	1833.75
08_B	601	7	0.282032	0.00028014	0.0013531	3.06495e-05	0.282427	0.282837	0.282017	-26.6366	-14.5058	0.490869	2.2107	16.0022	1643.07
Sample SAIC 06A
	U/Pb		Sample (Present day ratios)				CHUR	DM	Sample Initial Ratios				DM Model	%	Crustal
	Age (Ma)	±2s	176Hf/177Hf	±2SE	176Lu/177Hf	±2SE	176Hf/177Hf (t)	176Hf/177Hf (t)	176Hf/177Hf (t)	eHf(0)	eHf(t)	±2SE	Age (Ga)	corr	residence
02_A	510	7	0.282003	0.000176538	0.000547626	3.68674e-05	0.282467	0.282883	0.281998	-27.6522	-16.6208	1.29424	2.27734	6.13369	1773.34
07_A	518	6	0.281862	0.000251552	0.000369622	5.52126e-06	0.282464	0.282879	0.281858	-32.6457	-21.4275	0.633302	2.54902	4.30699	2039.02
09_A	503	7	0.282228	0.000215053	0.000773929	5.04271e-05	0.28246	0.282874	0.282221	-19.6894	-8.46217	0.656217	1.831	10.203	1315
01_B*	503	7	0.281668	0.000175682	0.000549555	3.09582e-05	0.282468	0.282884	0.281663	-39.4943	-28.4989	2.01981	2.93354	6.71749	2430.54
02_B*	494	6	0.28216	0.000178619	0.00111488	0.000126116	0.282474	0.28289	0.282149	-22.1165	-11.4852	1.44599	1.98272	14.354	1488.72
03_B	496	8	0.281785	0.000322766	0.000267309	4.43955e-06	0.282472	0.282889	0.281782	-35.3692	-24.4301	0.827758	2.70375	3.21627	2207.75
05_B	498	8	0.281584	0.000234664	0.000214971	2.78823e-06	0.282471	0.282888	0.281582	-42.4698	-31.4769	0.940151	3.09298	2.5271	2594.98
06_B	489	4	0.281772	0.000204842	0.000479875	4.14388e-06	0.282477	0.282894	0.281768	-35.8182	-25.1039	0.440379	2.7353	6.14395	2246.3
07_B	499	8	0.281888	0.000200817	0.000428091	4.84739e-06	0.282471	0.282887	0.281884	-31.734	-20.7776	0.58318	2.50415	5.29167	2005.15
09_B	501	5	0.282095	0.000436335	0.000730473	3.08838e-05	0.282469	0.282885	0.282088	-24.4052	-13.497	0.726218	2.10079	10.068	1599.79
* Analysis excluded by ±2SE>1.0 and/or DM Model Age < U-Pb Age
Sample SAIC 07A
	U/Pb		Sample (Present day ratios)				CHUR	DM	Sample Initial Ratios				DM Model	%	Crustal
	Age (Ma)	±2s	176Hf/177Hf	±2SE	176Lu/177Hf	±2SE	176Hf/177Hf (t)	176Hf/177Hf (t)	176Hf/177Hf (t)	eHf(0)	eHf(t)	±2SE	Age (Ga)	corr	residence
07_A	499	5	0.282349	0.000172604	0.000449618	1.01542e-05	0.282471	0.282887	0.282345	-15.4251	-4.45761	0.148061	1.59209	5.36665	1093.09
08_A	492	5	0.282028	0.000213395	0.000775004	1.28528e-05	0.282475	0.282892	0.282021	-26.7654	-16.0715	0.44202	2.2371	10.2952	1745.1
09_A	507	6	0.282035	0.000295955	0.000290005	4.5456e-06	0.282465	0.282881	0.282033	-26.5096	-15.3241	0.437623	2.20754	3.53429	1700.54
01_B	505	6	0.282823	0.00027001	0.000514691	1.08185e-05	0.282467	0.282882	0.282818	1.34276	12.4399	0.421158	0.635902	5.87646	130.902
02_B	494	5	0.282829	0.000488476	0.00170772	9.4275e-05	0.282474	0.28289	0.282813	1.54774	12.0107	0.805361	0.651701	19.6591	157.701
03_B	498	5	0.282258	0.000227578	0.00126105	3.8649e-05	0.282471	0.282888	0.282246	-18.6343	-7.96082	0.330331	1.78838	17.0055	1290.38
04_B	500	5	0.281592	0.000309183	0.000729356	5.33782e-06	0.28247	0.282886	0.281585	-42.2031	-31.3363	0.577106	3.08688	9.29885	2586.88
05_B	505	5	0.282175	0.000261448	0.000577163	1.03619e-05	0.282467	0.282882	0.282169	-21.5765	-10.5261	0.302949	1.93788	7.25697	1432.88
06_B	490	6	0.281769	0.00026563	0.000564528	4.35569e-06	0.282476	0.282893	0.281764	-35.9286	-25.2199	0.527177	2.7425	6.72457	2252.5
08_B	543	8	0.282072	0.000281451	0.000594994	6.07883e-06	0.282443	0.282855	0.282066	-25.2193	-13.343	0.346216	2.12598	7.7758	1582.98
Sample SAIC 09
	U/Pb		Sample (Present day ratios)				CHUR	DM	Sample Initial Ratios				DM Model	%	Crustal
	Age (Ma)	±2s	176Hf/177Hf	±2SE	176Lu/177Hf	±2SE	176Hf/177Hf (t)	176Hf/177Hf (t)	176Hf/177Hf (t)	eHf(0)	eHf(t)	±2SE	Age (Ga)	corr	residence
01_A	511	7	0.282075	0.000353502	0.00058324	7.06883e-06	0.282463	0.282878	0.28207	-25.1023	-13.9259	0.377	2.13279	8.08183	1621.79
02_A	528	4	0.282378	0.000446901	0.00154975	1.3401e-05	0.282452	0.282866	0.282363	-14.3929	-3.16883	0.056423	1.5427	21.7058	1014.7
04_A	498	12	0.282676	0.000401973	0.00142357	8.82665e-06	0.282471	0.282888	0.282662	-3.86587	6.77024	0.214744	0.954658	19.8145	456.658
06_A	556	7	0.28193	0.000216842	0.000605776	1.76367e-05	0.282434	0.282845	0.281924	-30.2205	-18.0682	0.767418	2.39968	8.16446	1843.68
09_A	606	5	0.282157	0.000287708	0.000928707	1.79887e-05	0.282403	0.282809	0.282147	-22.1947	-9.06121	0.259514	1.93697	12.9128	1330.97
01_B	533	4	0.281963	0.000243823	0.000551591	7.43357e-06	0.282449	0.282862	0.281958	-29.0553	-17.3883	0.379864	2.34337	7.41629	1810.37
04_B	549	11	0.282175	0.000222221	0.00059794	9.63702e-06	0.282439	0.28285	0.282169	-21.5699	-9.55811	0.353086	1.91902	8.08013	1370.02
05_B	563	7	0.281852	0.000252124	0.000566029	5.01166e-06	0.28243	0.28284	0.281846	-33.0004	-20.6828	0.458785	2.55042	7.5878	1987.42
06_B	540	5	0.281756	0.000297071	0.000624447	3.18556e-06	0.282445	0.282857	0.281749	-36.4014	-24.6152	0.379443	2.74941	8.534	2209.41
07_B	538	6	0.281741	0.000231064	0.000300406	6.22263e-06	0.282446	0.282858	0.281737	-36.9357	-25.0783	0.819724	2.77335	3.81734	2235.35
Sample SAIC 10 A
	U/Pb		Sample (Present day ratios)				CHUR	DM	Sample Initial Ratios				DM Model	%	Crustal
01_A	512	5	0.281667	0.000242279	0.000678066	1.43534e-05	0.282462	0.282877	0.28166	-39.5362	-28.3866	0.902523	2.93462	8.51518	2422.62
02_A	515	5	0.280915	0.000115006	0.000218665	4.44492e-06	0.28246	0.282875	0.280913	-66.1141	-54.7721	1.66758	4.36846	2.03876	3853.46
03_A	525	7	0.280794	0.000161824	0.000323823	4.42477e-06	0.282454	0.282868	0.280791	-70.4124	-58.8906	1.62384	4.59656	3.8026	4071.56
04_A	514	7	0.282858	0.000336426	0.00283845	0.00010629	0.282461	0.282876	0.282831	2.58514	13.0894	0.683981	0.60584	40.6377	91.8404
06_A	504	5	0.280868	0.000226976	0.000477639	4.51568e-06	0.282467	0.282883	0.280863	-67.7961	-56.7864	1.14611	4.46729	5.89707	3963.29
07_A	525	5	0.281024	0.000223762	0.000476681	8.75241e-06	0.282454	0.282868	0.28102	-62.259	-50.781	1.45646	4.16245	6.0678	3637.45
08_A	509	6	0.282869	0.00032282	0.00284516	9.45905e-05	0.282464	0.28288	0.282842	2.98057	13.3802	0.617835	0.585125	36.0229	76.1245
03_B*	525	8	0.281372	0.00027111	0.00111906	3.17146e-05	0.282454	0.282868	0.281361	-49.9779	-38.7094	1.7242	3.50968	13.9077	2984.68
04_B*	527	10	0.281512	0.000243308	0.000996911	3.78518e-05	0.282453	0.282866	0.281502	-45.0232	-33.663	1.94601	3.23603	14.6911	2709.03
07_B	530	10	0.281951	0.000325157	0.00159155	5.63419e-05	0.282451	0.282864	0.281935	-29.4966	-18.2624	1.01213	2.38955	20.7005	1859.55
* Analysis excluded by ±2SE>1.0 and/or DM Model Age < U-Pb Age
Sample SAIC 10B
	U/Pb		Sample (Present day ratios)				CHUR	DM	Sample Initial Ratios				DM Model	%	Crustal
	Age (Ma)	±2s	176Hf/177Hf	±2SE	176Lu/177Hf	±2SE	176Hf/177Hf (t)	176Hf/177Hf (t)	176Hf/177Hf (t)	eHf(0)	eHf(t)	±2SE	Age (Ga)	corr	residence
01_A	513	5	0.282077	0.000204192	0.000860629	5.37501e-05	0.282462	0.282877	0.282068	-25.0474	-13.9215	1.01522	2.13414	11.1856	1621.14
03_A*	521	5	0.281587	0.000159618	0.000714676	4.62748e-05	0.282457	0.282871	0.28158	-42.3697	-31.0389	2.44437	3.0875	9.43153	2566.5
04_A*	517	7	0.281511	0.000159822	0.000256301	3.82757e-06	0.282459	0.282874	0.281508	-45.0572	-33.6596	0.977517	3.22778	2.76431	2710.78
06_A	515	4	0.281939	0.000271522	0.00103309	3.72525e-05	0.28246	0.282875	0.281929	-29.9141	-18.8091	0.842447	2.40784	13.1615	1892.84
08_A	512	6	0.281765	0.000272188	0.000498225	1.25629e-05	0.282462	0.282877	0.281761	-36.0584	-24.8436	0.941575	2.73947	6.45209	2227.47
09_A	532	11	0.282074	0.000629585	0.00133825	2.9567e-05	0.28245	0.282863	0.28206	-25.1582	-13.7866	0.620432	2.1419	17.0322	1609.9
01_B	503	6	0.282313	0.000194681	0.00121606	6.38199e-06	0.282468	0.282884	0.282302	-16.6817	-5.8833	0.105111	1.6756	15.4988	1172.6
02_B	502	6	0.282254	0.000268601	0.00108696	1.57525e-05	0.282462	0.282877	0.282243	-18.7889	-7.73294	0.179722	1.78764	13.9425	1274.64
04_B	479	5	0.281786	0.000273372	0.000679281	1.79948e-05	0.282469	0.282885	0.28178	-35.3179	-24.383	0.961014	2.70599	8.54761	2203.99
08_B	513	4	0.282126	0.000510742	0.00129675	6.55823e-05	0.282483	0.282901	0.282114	-23.3177	-13.0701	0.821105	2.05925	14.2604	1580.25
* Analysis excluded by ±2SE>1.0 and/or DM Model Age < U-Pb Age
Sample SAIC 12
	U/Pb		Sample (Present day ratios)				CHUR	DM	Sample Initial Ratios				DM Model	%	Crustal
	Age (Ma)	±2s	176Hf/177Hf	±2SE	176Lu/177Hf	±2SE	176Hf/177Hf (t)	176Hf/177Hf (t)	176Hf/177Hf (t)	eHf(0)	eHf(t)	±2SE	Age (Ga)	corr	residence
02_A*	515	18	0.281522	0.000314249	0.000243688	8.31361e-06	0.28246	0.282875	0.28152	-44.6497	-33.2917	2.33653	3.20605	2.78075	2691.05
03_A*	483	19	0.281073	0.000528146	0.000293755	6.58969e-06	0.282481	0.282899	0.28107	-60.5374	-49.9222	3.17751	4.08237	2.81273	3599.37
04_A*	520	18	0.281377	0.000210561	0.00023523	6.8572e-06	0.282457	0.282871	0.281375	-49.7772	-38.3112	2.47164	3.48398	2.63753	2963.98
06_A	508	18	0.281482	0.000250973	0.00029673	4.81052e-06	0.282465	0.28288	0.281479	-46.0721	-34.8888	1.83294	3.28771	3.53797	2779.71
07_A*	499	18	0.281446	0.000295112	0.000241918	4.71399e-06	0.282471	0.282887	0.281444	-47.3423	-36.3415	2.05717	3.35974	2.61255	2860.74
02_B	523	5	0.281463	0.000437383	0.000431629	6.56308e-06	0.282455	0.282869	0.281459	-46.7447	-35.2769	0.928473	3.32099	4.54435	2797.99
03_B	517	10	0.281782	0.000233614	0.000824111	1.48335e-05	0.282459	0.282874	0.281774	-35.4651	-24.2514	0.925697	2.7108	10.266	2193.8
06_B	527	8	0.281237	0.00024342	0.000364439	4.33341e-06	0.282453	0.282866	0.281233	-54.7561	-43.1859	1.20646	3.75429	4.3315	3227.29
07_B	516	7	0.281371	0.000193776	0.000247218	6.57556e-06	0.28246	0.282874	0.281369	-50.0064	-38.6335	1.57829	3.49829	2.85879	2982.29
08_B	496	4	0.28188	0.000455955	0.00128056	5.63014e-05	0.282472	0.282889	0.281868	-32.0193	-21.4102	1.14862	2.53678	14.3116	2040.78
* Analysis excluded by ±2SE>1.0 and/or DM Model Age < U-Pb Age
Sample SAIC 13
	U/Pb		Sample (Present day ratios)				CHUR	DM	Sample Initial Ratios				DM Model	%	Crustal
01_A	621.281	9.58799	0.282287	7.41937e-05	0.00110728	1.62521e-05	0.282393	0.282797	0.282274	-17.6205	-4.22087	0.1282	1.67701	18.0469	1055.73
04_A	641.299	8.08041	0.281931	0.00033311	0.00096879	1.16377e-05	0.28238	0.282783	0.281919	-30.1942	-16.3185	0.420922	2.37097	17.8905	1729.67
05_A	604.463	10.1431	0.282348	7.52052e-05	0.0010194	2.69586e-05	0.282404	0.28281	0.282336	-15.4539	-2.38122	0.103565	1.55966	15.9824	955.2
09_A	597.045	7.62957	0.28229	8.27853e-05	0.000579848	5.71402e-06	0.282408	0.282815	0.282283	-17.5125	-4.42967	0.101557	1.66931	8.61449	1072.26
01_B	593.599	7.27478	0.28243	0.000108371	0.00133632	3.80547e-05	0.282411	0.282818	0.282415	-12.5531	0.161743	0.00665028	1.40708	21.3762	813.477
02_B	598.287	5.69749	0.282587	0.000109258	0.0015298	1.19631e-05	0.282408	0.282814	0.282569	-7.01633	5.73008	0.101593	1.09447	24.4609	496.183
05_B	584.868	6.78235	0.282395	9.06481e-05	0.00107979	1.46355e-05	0.282416	0.282824	0.282383	-13.795	-1.17036	0.0298107	1.47547	16.7252	890.602
06_B	629.799	6.11712	0.282633	8.1867e-05	0.00150601	2.23024e-05	0.282388	0.282791	0.282616	-5.35796	8.07701	0.200402	0.98585	24.1933	356.051
07_B	621.405	8.52184	0.282597	9.91497e-05	0.00127999	4.62943e-05	0.282393	0.282797	0.282582	-6.65993	6.68627	0.335867	1.05851	20.8283	437.103
08_B	612.662	21.7547	0.282618	0.000100522	0.000944406	1.47311e-05	0.282398	0.282804	0.282607	-5.92001	7.37481	0.379525	1.0122	14.3695	399.539
